# Supplementary material for: Phosphate Adsorption from Aqueous Solution Using Electrospun Cellulose Acetate Nanofiber Membrane Modified with Graphene Oxide/Sodium Dodecyl Sulphate
Source: MDPI journal article supplement (doi:10.3390/membranes11070546), 2021-07-20
Supplement: s1 [file s1]

$$C_e/q_e = 1/q_m b + C_e/q_m \quad (S1)$$

where,  $q_m$  and  $b$  are the Langmuir adsorption constant related to maximum monolayer adsorption capacity and energy, respectively.

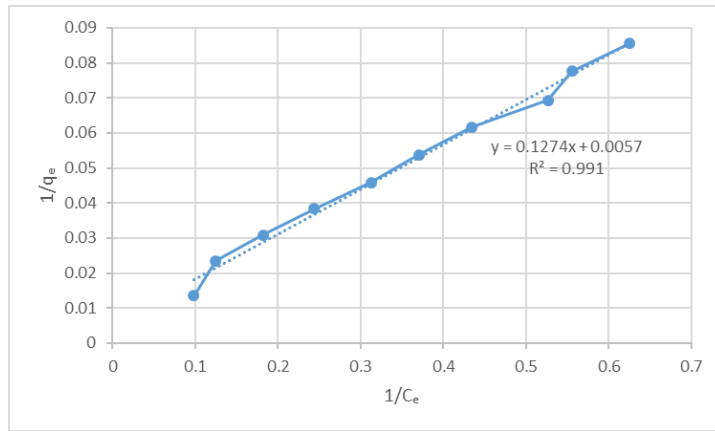

**Figure S1.** A Langmuir plot ( $1/q_e$  vs.  $1/C_e$ ) for phosphate adsorption by CA/GO/SDS at different masses of membrane.

**Table S1.** Constant parameters and correlation co-efficients calculated for different adsorption isotherm models for phosphate adsorption.

| Isotherm   | Mass of membrane (g) | constants |       |       |        |
|------------|----------------------|-----------|-------|-------|--------|
|            |                      | $Q_o$     | $b$   | $R_L$ | $R^2$  |
| Langmuir   | 0.05                 | 175.44    | 0.04  | 0.5   | 0.991  |
| Freundlich | 0.05                 | $K_f$     | $n$   |       |        |
|            |                      | 7.647     | 1.117 |       | 0.9774 |
